# Supplementary material
Source: ML conference proceedings conference paper supplement (https://openreview.net/forum?id=CGZGY3X8NH)
Supplement: supplementary_material [file attachment]

We, the authors of the dataset entitled "ELSA: Evaluating Localization of Social Activities in Urban Streets using Open-Vocabulary Detection," hereby declare that:

**Responsibility Acknowledgment:**

We bear all responsibility for any potential violations of rights, including but not limited to intellectual property rights, privacy rights,

and any other applicable regulations that may arise from the use, distribution,

and publication of the ELSA dataset. We have taken all necessary steps to ensure that the ELSA dataset complies with relevant laws and ethical standards.

Data License Confirmation: We confirm that the ELSA dataset, which includes metadata for the images and the labels, is made available under the CC-BY 4.0 license. This license allows for free use, distribution, and modification of the ELSA dataset provided that appropriate credit is given, a link to the license is provided, and any changes made are indicated. The actual images referenced in the ELSA dataset can be downloaded from third-party providers as explained in the datasheet and are not included in the ELSA dataset license.

We affirm that we have the right to distribute the ELSA dataset under the specified license and that the use of the ELSA dataset by others in accordance with this license will not infringe on the rights of any third parties.

Signed,

Maryam Hosseini

Massachusetts Institute of Technology (MIT)

Marco Cipriano

Hasso Plattner Institute (HPI)

Daniel Hodczak

University of Illinois Chicago (UIC)

Sedigheh Eslami

Hasso Plattner Institute (HPI)

Liu Liu

Massachusetts Institute of Technology (MIT)

Andres Sevtsuk

Massachusetts Institute of Technology (MIT)

Gerard de Melo

Hasso Plattner Institute (HPI)
