# Supplementary material
Source: ML conference proceedings conference paper supplement (https://openreview.net/forum?id=CGZGY3X8NH)
Supplement: supplementary_material [file attachment]

## A Appendix

In this appendix we provide supplementary information about our work. The first Section addresses a small typo from the main submission, [A.1](#) offers further details on the labels used in the study, examples of annotations are provided in [A.2](#), while a comprehensive table listing all labels in the dataset can be found in [A.3](#), additional results are presented in [A.5](#), complemented by qualitative results in [A.6](#). In [A.7](#) we include some additional discussion and limitations of ELSA. Finally, in [A.8](#) we provide information on the implementation details.

### Erratum

Table [3](#) reports an updated version of the semantic stability scores. We wish to point a small typo from table in [4.3](#). The reported values are in percentage.

| Method                     | CS  | CSA | All |
|----------------------------|-----|-----|-----|
| Grounding DINO (N-LSE)     | 64% | 65% | 64% |
| Grounding DINO (Max-Logit) | 57% | 56% | 56% |

Table 3: Fixed typo in Semantic Stability scores.

### A.1 Label categories

In the realm of social interaction recognition, the labels under the “Activity” category are instrumental in identifying engagement patterns and interaction types, distinguishing, for example, between conversational engagement and co-active behavior.

Activity labels are non-disjoint, capturing the complexity of human behavior where multiple actions can co-occur, like *talking* while *pushing a stroller*.

We also have another category of labels, namely, “Other” which represents characteristics of the scene that do not fall under the previous categories and are still important for understanding the features of the urban area. For example, the label *kid* can indicate a family-friendly area.

### A.2 Annotation examples

As shown in Figure [5](#) for activities that are described with another non-stationary object, e.g., *pushing a wheelchair* or *biking*, the annotated ground truth bounding box includes the object as well as the person performing the action (see Figure [5-a](#)), whereas for actions without an object that is actively a part of the action, the annotated bounding box merely captures the person, (see Figure [5-b](#) *sitting*).

### A.3 Full list of labels

Table [4](#) reports the full list of labels used during the annotation process in ELSA. We omit some additional meta-label which supported the annotation process and the statistic collection such as “no people” and “model hint”.

### A.4 Sanity Rules for Annotation Cleaning

In order to make sure that all the annotated labels for bounding boxes are correct, we performed a sanity-check using a predefined set of sanity rules. In the following, we summarize the full set of rules we considered at this stage:

1. Each bounding box must have a condition label, unless it is a “pet”;
2. Each bounding box must have at least one state label, unless it is a “pet”;
3. Each bounding box can only have one condition label associated, e.g., “alone” and “group” cannot appear together;

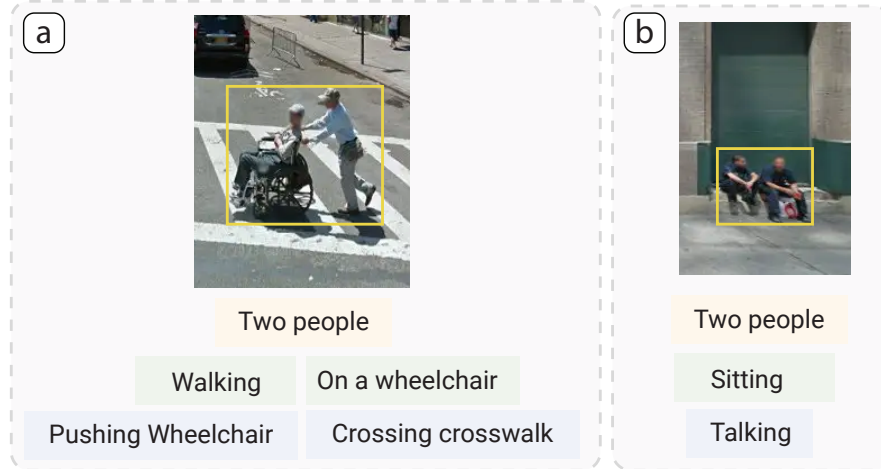

Figure 5: Example of rules of capture in annotation. a) two people sitting and the stairs are not captures as an annotation. b) two people crossing a crosswalk and one pushing a wheelchair. The wheelchair is captured in the annotation.

4. If a bounding box is associated with the “alone” condition, then it can only have one state label associated, e.g., “alone walking running” is not allowed;
5. If a bounding box is associated with the “couple/two person” condition, then it can only have two state labels associated, e.g., “couple walking sitting running” is not allowed;
6. If a bounding box is associated with the “shopping” activity, then state should include either one of “sitting” or “standing” labels;
7. If a bounding box is associated with the “street vendors” activity, then state should include either one of “sitting” or “standing” labels;
8. If a bounding box is associated with the “load/unload packages” activity, then state should include either one of “sitting” or “standing” labels;
9. If a bounding box is associated with the “waiting in bus station” activity, then state should include either one of “sitting” or “standing” labels;

## A.5 Additional Results

**Selecting relevant logits.** Grounding DINO uses the BERT model for tokenization. We keep the mapping between logits and tokens and their category of condition, state, activity. Using this mapping, we only keep the relevant tokens in our metric calculation. Figure 6 shows our metric being applied to relevant tokens (selected.loglse), to all tokens (whole.loglse) as well as the Max-logit (whole.argmax). In all three prompts, one target (the red box) was predicted with highest confidence. The ground truth for that target comprises of the following labels: *C: Alone + S: Standing + A: Phone interaction*. In this example, we showcase how the same target, is assigned three disjoint conditions, with high confidence. The same individual is returned as the highest confidence prediction for first prompt: “a group eating and sitting on a chair”, with 49% confidence in representing a “group”, and 11% eating. While in the second prompt, “two people including a child walking”, the model showed a high confidence in the red box showing two people (two:45% & people: 62% ). The third prompt, has a matching condition only, “alone”, which was returned by the model with 50% confidence. All predictions have pretty close confidence in the target representing disjoint conditions, highlighting the low understanding of the model in interpreting the condition in this image.

None of the people in this image match any of our queries. However, using the max log score, for the first prompt (Figure 6-top), all five boxes would pass the 0.3 threshold and be counted as likely

| Condition                | State                                                                                                                         | Activity                                                                                                                                                                                                                                                                                                                                                                                                                                                                           | Others                                                             |
|--------------------------|-------------------------------------------------------------------------------------------------------------------------------|------------------------------------------------------------------------------------------------------------------------------------------------------------------------------------------------------------------------------------------------------------------------------------------------------------------------------------------------------------------------------------------------------------------------------------------------------------------------------------|--------------------------------------------------------------------|
| Alone<br>Couple<br>Group | Sitting<br>Standing<br>Walking<br>Running<br>Biking<br>On wheelchair<br>Mobility aids<br>Riding carriage<br>Riding motorcycle | Dining<br>Snacking<br>Talking<br>Playing<br>Shopping<br>Hugging<br>Taking photo<br>Talking on phone<br>Taking Taxi<br>Pet interactions<br>Street vendors<br>Phone interaction<br>Waving to camera<br>Pushing stroller<br>Sport activities<br>Crossing crosswalk<br>Pushing wheelchair<br>Working with laptop<br>Construction workers<br>Pushing shopping cart<br>Waiting in bus station<br>At petrol/gas station<br>Public service/cleaning<br>Load/unload packages from car/truck | Pet<br>Kid<br>Police<br>Infant<br>Elderly<br>Teenager<br>With bike |

Table 4: Full list of labels in ELSA divided by category

476 candidates. However, using our score (N-LSE), none of the boxes would be selected. Same goes  
477 for the other two prompts. There is a notable difference between the two scores, highlighting the  
478 important role of the taking relevant query terms into account.

## 479 A.6 Qualitative results

480 As a prompt increases in level from *condition* to *condition, state, activity, and others*, the likelihood  
481 that the prompt contains labels which the model has low confidence trained on increases, lowering  
482 the computed score for the box. The outcome is that the most basic-level prompts are overrepresented  
483 among the predictions that pass score-based filters, and high-level prompts are extremely uncommon.  
484 *Condition* prompts accounted for less than 2% of the total prompts generated, but were 20% of the  
485 bounding boxes that passed initial thresholding on score. Conversely, when more conventionally  
486 determining the score by the maximum logit for the box, higher-level prompts have more logits and  
487 therefore always result in higher representation in the predictions that pass the threshold.

488 When a prompt includes an object that is among the pre-trained vocabulary, the model can more  
489 easily detect and localize it. This is a case where contextual cueing leads to better predictions. For  
490 instance, when we query for "group of people sitting" the model less frequently finds the correct  
491 target, but the prompt "groups of people sitting on a chair" can lead to a better prediction.

492 The most challenging part for the models was recognizing *state*. The confidence of the model in  
493 associating the area inside each box with the labels in *state* group is very low across all images and  
494 all set of queries.

495 To further analyze the model’s understanding of people’s states (sitting, standing, walking, etc.) we  
496 prompt it using its native Max-logit scoring and the 0.3 threshold. Here, we used variations of our  
497 original prompt “a group of people sitting on a bench” : ‘a group of people standing on a bench’;  
498 and ‘a group of people running on a bench’. These prompts do not have semantically valid *state*

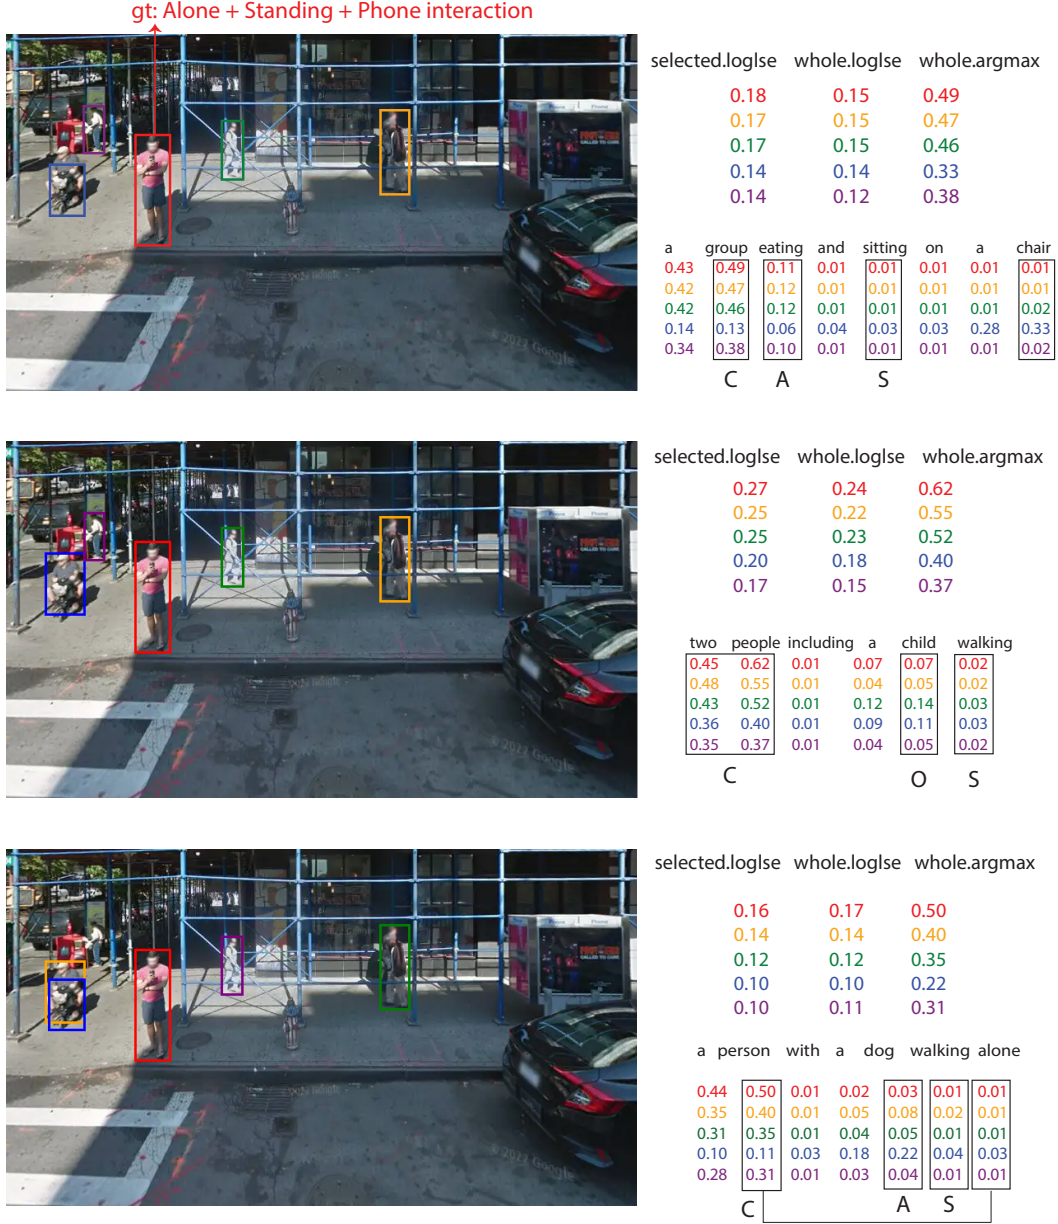

Figure 6: An example of the top five predictions of the model for three distinct prompts on the same image is provided. Each image is accompanied by two tables. The first table displays the overall score for each color-coded box, including three different metrics: N-LSE on selected tokens (ours), N-LSE on all tokens, and the maximum logit of all tokens. The second table presents the model’s confidence in the presence of the tokens within each box. The selected tokens used to compute the N-LSE metric are highlighted with boxes annotated by C:condition, S:state, A: activity and O:others.

499 *verbs* and are not among our set of prompt list. In all three cases, one target was in common and  
500 had the highest confidence, as shown in Figure 7. When prompted *people sitting on a bench*, the  
501 model returned one result 44% confidence, however, the model assigned higher confidence to the  
502 same target with *people standing on a bench* with 52.98% confidence and 53.08% confidence in the  
503 box showing *people running on a bench*. The Max-logit method results in false positive predictions

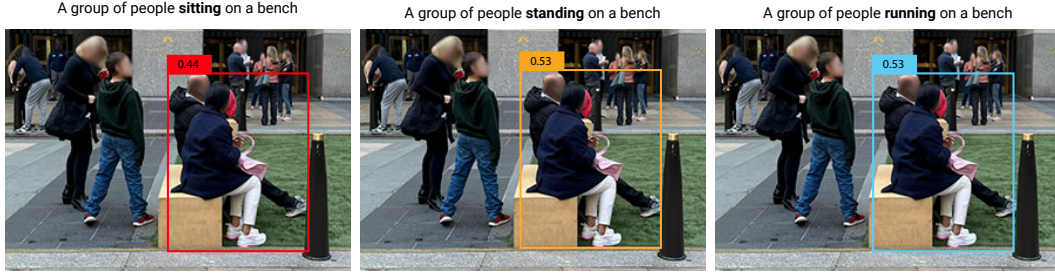

Figure 7: Using the native Grounding DINO model with Swin-T backbone and Max-logit scoring to run variations of the same prompt with different states.

504 with very high confidence and undermine the actual context of the query by allowing the logit with  
 505 the maximum confidence to represent the whole query.

## 506 A.7 Discussion

507 Existing OVDs exhibit a number of challenges. They often struggle with semantic consistency across  
 508 diverse inputs, showing limited adaptability to novel or unseen categories, and can suffer from high  
 509 computational costs during inference. Additionally, these models may demonstrate sensitivity to  
 510 slight variations in input phrasing, leading to inconsistent performance. The calibration of their  
 511 predictive confidence, especially in out-of-distribution scenarios, remains suboptimal, frequently  
 512 resulting in overconfident predictions that do not accurately reflect their actual accuracy.

513 Following Desai et al. [9], we categorize target interactions into spatial relationship (people sit “on”  
 514 something ), spatial co-occurrence (pedestrians usually co-occur, a stroller should co-occur with a  
 515 human), and mutual exclusion or disjoint (an individual cannot be sitting and walking at the same  
 516 time). We incorporated the main non-stationary objects like bike, wheelchair, stroller, luggage, or  
 517 shopping card in our annotation boxes.

518 Aside from the challenging nature of human activity and interaction detection, the lower quality of  
 519 large-scale publicly available street-level images impact the detection results. On top of that, the  
 520 anonymization process to blur faces creates artifacts that can impact the other people in the scene,  
 521 making them difficult to be detected.

522 Although the metrics and evaluation protocols presented herein are applicable to any OVD model, this  
 523 study was confined to a single model. Future work will encompass the inclusion of additional OVD  
 524 models in our benchmark, enabling a comprehensive comparison of their understanding, stability,  
 525 and localization accuracy in detecting social activities.

526 Our findings also highlight the need for the incorporation of uncertainty estimation techniques during  
 527 model fine-tuning and training to mitigate the risk of overconfident false predictions.

## 528 A.8 Resource requirements implementation details?

529 The generation of all the predictions with Grounding DINO takes around eight hours on three H100  
 530 with 80GB of memory. The generation of the results on an Intel(R) Xeon(R) Platinum 8480CL takes  
 531 around ten minutes.

532 We used the Open Grounding DINO implementation, which is also featured on the official repository  
 533 of the paper [1]. Our inference was done using the configuration from the official repository with  
 534 Swin-T backbone, pre-trained on O365, GoldG, and Cap4M dataset.

---

<https://github.com/urban-submissions/elsa>
