# Supplementary material
Source: ML conference proceedings conference paper supplement (https://openreview.net/forum?id=CGZGY3X8NH)
Supplement: supplementary_material [file urls.txt.docx]

URL to website/platform where the dataset/benchmark can be viewed and downloaded by the reviewers:

<https://github.com/urban-submissions/elsa/tree/main/dataset>

URL to Croissant metadata record documenting the dataset/benchmark available for viewing and downloading by the reviewers:

<https://github.com/urban-submissions/elsa/blob/main/croissant.json>
